# Supplementary material
Source: MDPI journal article supplement (https://www.mdpi.com/2073-4441/7/6/2971)
Supplement: s1 [file s1]

# Supplementary Information

**Table S1.** Scores reflecting the changes for human pressure indicators.

| Human Pressure                                          | Indicator                                                                                        | Data Used in This Study (Period) | Classes (Acronyms)                                      | Score   | References for Indicators and Classes                                                               |   |
|---------------------------------------------------------|--------------------------------------------------------------------------------------------------|----------------------------------|---------------------------------------------------------|---------|-----------------------------------------------------------------------------------------------------|---|
| On longitudinal continuity upstream, on the basin scale | Basin area upstream dams and reservoirs                                                          | Other published studies [1,2]    | 0                                                       | 0       | [3]                                                                                                 |   |
|                                                         |                                                                                                  |                                  | 0%–33%                                                  | 3       |                                                                                                     |   |
|                                                         |                                                                                                  |                                  | 33%–66%                                                 | 6       |                                                                                                     |   |
|                                                         |                                                                                                  |                                  | >66%                                                    | 9       |                                                                                                     |   |
|                                                         | Other interventions on river longitudinal continuity upstream (e.g., weirs, check dams, bridges) |                                  | Absent (A)                                              | 0       | We extended the analysis of these indicators from local scale to catchment scale based also on [3]. |   |
|                                                         |                                                                                                  |                                  | Moderate (M)                                            | 3       |                                                                                                     |   |
|                                                         |                                                                                                  |                                  | Intense (I)                                             | 6       |                                                                                                     |   |
| On longitudinal continuity, on the local scale          | Number of local weirs or check dams on sector length                                             | Orthophotos (2010)               | 0                                                       | 0       | [3]                                                                                                 |   |
|                                                         |                                                                                                  |                                  | <1/1 km                                                 | 4       |                                                                                                     |   |
|                                                         |                                                                                                  |                                  | >1/1 km                                                 | 6       |                                                                                                     |   |
|                                                         | Number of local bridges on sector length                                                         |                                  | 0                                                       | 0       |                                                                                                     |   |
|                                                         |                                                                                                  |                                  | <1/1 km                                                 | 2       |                                                                                                     |   |
|                                                         |                                                                                                  |                                  | >1/1 km                                                 | 3       |                                                                                                     |   |
| On lateral continuity, on the local scale               | Length of bank protection from both banks length                                                 |                                  | <5%                                                     | 0       |                                                                                                     |   |
|                                                         |                                                                                                  |                                  | 5%–33%                                                  | 3       |                                                                                                     |   |
|                                                         |                                                                                                  |                                  | >33%                                                    | 6       |                                                                                                     |   |
|                                                         | Length of reforested banks from both banks length                                                |                                  | <5%                                                     | 0       | Bravard <i>et al.</i> [4] consider that forestation favored the lateral stability of river channel. |   |
|                                                         |                                                                                                  |                                  | 5%–33%                                                  | 2       |                                                                                                     |   |
|                                                         |                                                                                                  |                                  | >33%                                                    | 3       |                                                                                                     |   |
|                                                         | Length of levees (close or at the contact) from both banks length                                |                                  | <10%                                                    | 0       | [3]                                                                                                 |   |
|                                                         |                                                                                                  |                                  | 10%–50%                                                 | 3       |                                                                                                     |   |
|                                                         |                                                                                                  |                                  | >50%                                                    | 6       |                                                                                                     |   |
| On the substrate                                        |                                                                                                  |                                  | Length of quasi-impermeable revetments on sector length | 0       |                                                                                                     | 0 |
|                                                         |                                                                                                  |                                  |                                                         | <1/1 km |                                                                                                     | 3 |
|                                                         |                                                                                                  |                                  |                                                         | >1/1 km |                                                                                                     | 6 |
|                                                         | Length of rectifications from sector length                                                      |                                  | 0                                                       | 0       |                                                                                                     |   |
|                                                         |                                                                                                  |                                  | <10%                                                    | 2       |                                                                                                     |   |
|                                                         |                                                                                                  |                                  | >10%                                                    | 3       |                                                                                                     |   |
| Various impacts                                         | Local sediment mining activity (in-stream, from the floodplain)                                  |                                  | Absent (A)                                              | 0       |                                                                                                     |   |
|                                                         |                                                                                                  |                                  | Moderate (M)                                            | 3       |                                                                                                     |   |
|                                                         |                                                                                                  |                                  | Intense (I)                                             | 6       |                                                                                                     |   |
|                                                         | Wood removal                                                                                     | Field surveys                    | Absent (A)                                              | 0       |                                                                                                     |   |
|                                                         |                                                                                                  |                                  | Moderate (M)                                            | 2       |                                                                                                     |   |
|                                                         |                                                                                                  |                                  | Intense (I)                                             | 5       |                                                                                                     |   |
|                                                         | Removal of riparian vegetation                                                                   |                                  | Absent (A)                                              | 0       |                                                                                                     |   |
|                                                         |                                                                                                  |                                  | Moderate (M)                                            | 2       |                                                                                                     |   |
|                                                         |                                                                                                  |                                  | Intense (I)                                             | 5       |                                                                                                     |   |

**Table S2.** Scores of change/trend for channel form indicators.

| Channel Adjustments     | Indicator                                                                                                                    | Data Used in This Study (Period)             | Classes        | Score | References for Indicators and Classes                                                                                                                                                                                                                                                              |
|-------------------------|------------------------------------------------------------------------------------------------------------------------------|----------------------------------------------|----------------|-------|----------------------------------------------------------------------------------------------------------------------------------------------------------------------------------------------------------------------------------------------------------------------------------------------------|
| Longitudinal<br>Lateral | Wavelength<br>Streamwise length<br>Sinuosity index<br>Amplitude<br>Radius of curvature ( $r_c$ )<br>Width ( $w$ )<br>$r_c/w$ | Topographic maps (1954) & Orthophotos (2005) | No change (NC) | 0     | Meanders’ geometry parameters are calculated based on the scheme of Leopold <i>et al.</i> [5]. The change in meander geometry for 1954 and 2005 time horizons was compared with Mann-Whitney non-parametric test [6].                                                                              |
|                         | Change (C)                                                                                                                   |                                              | 6              |       |                                                                                                                                                                                                                                                                                                    |
| Vertical                | Cross-sectional area<br>Maximum depth<br>Width-to-mean-depth ratio                                                           | Cross profiles (1966–2010)                   | Trend (T)      | 0     | Cross-section area was previously used by Salit [7], maximum depth by James [8] and width-to-mean-depth ratio by Rasmussen and Mossa [9]. We evaluated the trend of area, maximum depth and width-to-mean-depth ratio time series for 1966–2010 by using non-parametric test of Mann-Kendall [10]. |
|                         |                                                                                                                              |                                              | No trend (NT)  | 6     |                                                                                                                                                                                                                                                                                                    |

**Table S3.** Scores of change for functionality indicators.

| Functionality                | Indicator                                                                                                                                                                                                          | Data Used in This Study (Period)             | Classes (Acronyms)        | Score | References for Indicators and Classes                                            |
|------------------------------|--------------------------------------------------------------------------------------------------------------------------------------------------------------------------------------------------------------------|----------------------------------------------|---------------------------|-------|----------------------------------------------------------------------------------|
| Within the valley            | Presence of a continuous and large floodplain from both banks length                                                                                                                                               | Orthophotos (2010)                           | >66%                      | 0     | [11]                                                                             |
|                              |                                                                                                                                                                                                                    |                                              | 10%–66%                   | 3     |                                                                                  |
|                              |                                                                                                                                                                                                                    |                                              | <10%                      | 5     |                                                                                  |
|                              | Connectivity between terraces and river corridor from both banks length                                                                                                                                            |                                              | >90%                      | 0     |                                                                                  |
|                              |                                                                                                                                                                                                                    |                                              | 33%–90%                   | 3     |                                                                                  |
|                              |                                                                                                                                                                                                                    |                                              | <33%                      | 5     |                                                                                  |
| Within the erodible corridor | Intensity of lateral migration of meanders                                                                                                                                                                         | Topographic maps (1954) & Orthophotos (2005) | Intense (I)               | 0     | Lateral migration of meanders is compared with the types proposed by Hooke [12]. |
|                              |                                                                                                                                                                                                                    |                                              | Moderate (M)              | 2     |                                                                                  |
|                              |                                                                                                                                                                                                                    |                                              | Absent (A)                | 5     |                                                                                  |
|                              | Intensity of cut-off process before and after 1954                                                                                                                                                                 | Other published studies [2]                  | Same or more intense (>I) | 0     |                                                                                  |
|                              |                                                                                                                                                                                                                    |                                              | Less intense (<I)         | 6     |                                                                                  |
|                              | Presence of accumulation forms ( <i>i.e.</i> , above-water bars devoid of vegetation in the vicinity of convex banks of analyzed meanders)<br><br>Length of a potentially erodible corridor from both banks length | Orthophotos (2010)                           | Intense (I)               | 0     | [11]                                                                             |
|                              |                                                                                                                                                                                                                    |                                              | Moderate (M)              | 2     |                                                                                  |
|                              |                                                                                                                                                                                                                    |                                              | Absent (A)                | 3     |                                                                                  |
|                              |                                                                                                                                                                                                                    |                                              | >66%                      | 0     |                                                                                  |
|                              |                                                                                                                                                                                                                    |                                              | 33%–66%                   | 3     |                                                                                  |
| <33%                         |                                                                                                                                                                                                                    |                                              | 6                         |       |                                                                                  |

Table S3. Cont.

| Functionality                    | Indicator                                                     | Data Used in This Study (Period)                                   | Classes (Acronyms)                            | Score | References for Indicators and Classes                                                                                                                                                                                                                                                                                                                                                                                                  |
|----------------------------------|---------------------------------------------------------------|--------------------------------------------------------------------|-----------------------------------------------|-------|----------------------------------------------------------------------------------------------------------------------------------------------------------------------------------------------------------------------------------------------------------------------------------------------------------------------------------------------------------------------------------------------------------------------------------------|
| Within the river channel         | Composition of the substrate                                  | Cross-sectional profiles (1966–2010)                               | No change (NC)                                | 0     | [11]                                                                                                                                                                                                                                                                                                                                                                                                                                   |
|                                  |                                                               |                                                                    | Change to a similar grain size particles (~C) | 2     |                                                                                                                                                                                                                                                                                                                                                                                                                                        |
|                                  |                                                               |                                                                    | Change (C)                                    | 5     |                                                                                                                                                                                                                                                                                                                                                                                                                                        |
|                                  | Presence of large wood in-stream                              | Field surveys                                                      | Present (P)                                   | 0     |                                                                                                                                                                                                                                                                                                                                                                                                                                        |
|                                  |                                                               |                                                                    | Absent (A)                                    | 3     |                                                                                                                                                                                                                                                                                                                                                                                                                                        |
| Connectivity with the floodplain | Presence of oxbow wetlands                                    | Orthophotos (2005)                                                 | Present (P)                                   | 0     | The return period of $Q_b$ was estimated based on Log-Pearson III distribution; this distribution is derived from three-parameter gamma distributions by logarithmic transformation and is a popular choice for fitting the frequency distribution of extreme hydrologic data such as annual flood data [6]. $Q_b$ with a return interval of 1–2 years is considered normal by Leopold [13]; 50 years is the life span of levees [14]. |
|                                  |                                                               |                                                                    | Absent (A)                                    | 6     |                                                                                                                                                                                                                                                                                                                                                                                                                                        |
|                                  | Return period of bankfull discharge ( $Q_b$ )                 | Cross profiles (1966–2010) & Maximum annual discharges (1961–2010) | 1–2 years                                     | 0     |                                                                                                                                                                                                                                                                                                                                                                                                                                        |
|                                  |                                                               |                                                                    | 2–50 years                                    | 3     |                                                                                                                                                                                                                                                                                                                                                                                                                                        |
|                                  |                                                               |                                                                    | >50 years                                     | 6     |                                                                                                                                                                                                                                                                                                                                                                                                                                        |
|                                  | Frequency of geomorphologically efficient floods ( $Q_{10}$ ) | Maximum annual discharges (1961–2010)                              | Several times                                 | 0     |                                                                                                                                                                                                                                                                                                                                                                                                                                        |
|                                  |                                                               |                                                                    | One time                                      | 3     |                                                                                                                                                                                                                                                                                                                                                                                                                                        |
|                                  |                                                               |                                                                    | Never                                         | 6     |                                                                                                                                                                                                                                                                                                                                                                                                                                        |

### Scores for pressure and alteration indicators on the Lower Prahova River

#### Indicators of pressures

- Basin area upstream dams and reservoirs—score = 6. We took into account six dams (Figure 1c), with or without reservoirs; according to data from Aquaproiect [1] they account for 34% of Prahova basin area.
- Other interventions on river longitudinal continuity upstream (e.g., weirs, check dams, bridges)—score = 3. We counted 41 bridges crossing Prahova River upstream the analyzed sector. Previous studies [2] showed several examples of weirs located downstream bridges in order to protect them from channel incision. Taking into account their number and roles, we estimated a moderate impact of these interventions on fluvial dynamics.
- Number of local weirs or check dams on sector length—score = 0. Absence of investigated elements.
- Number of local bridges on sector length—score = 2. We counted 8 bridges crossing the analyzed sector (length = 90 km), accounting for a density of 0.09 bridges/km.

- Length of bank protection from both banks length—score = 0. Absence of investigated elements.
- Length of reforested banks from both banks length—score = 2. We calculated a length of reforested banks of 27% of both banks.
- Length of levees (close or at the contact) from both banks length—score = 0. We calculated a length of levees for defense against flooding of 2.6% of both banks.
- Length of quasi-impermeable revetments on reach length—score = 0. Absence of investigated elements.
- Length of rectifications from reach length—score = 0. Absence of investigated elements.
- Local sediment mining activity (in-stream, from the floodplain)—score = 0. Absence of investigated elements.
- Wood removal—score = 0. Absence of investigated elements.
- Removal of riparian vegetation—score = 0. Absence of investigated elements.

#### **Indicators of alteration: channel adjustments**

- Wavelength—score = 0. Mann-Whitney two-tailed test detected no statistically significant changes between 1954 and 2005.
- Streamwise length—score = 0. Mann-Whitney two-tailed test detected no statistically significant changes between 1954 and 2005.
- Sinuosity index—score = 0. Mann-Whitney two-tailed test detected no statistically significant changes between 1954 and 2005.
- Amplitude—score = 0. Mann-Whitney two-tailed test detected no statistically significant changes between 1954 and 2005.
- Radius of curvature ( $r_c$ )—score = 6. Mann-Whitney two-tailed test detected statistically significant changes between 1954 and 2005. Mann-Whitney upper-tailed test indicated lower values in 2005 when compared to 1954.
- Width ( $w$ )—score = 6. Mann-Whitney two-tailed test detected statistically significant changes between 1954 and 2005. Mann-Whitney upper-tailed test indicated lower values in 2005 when compared to 1954.
- $r_c/w$ —score = 0. Mann-Whitney two-tailed test detected no statistically significant changes between 1954 and 2005.
- Cross-sectional area—score = 0. Mann-Kendall two-tailed test detected no statistically significant trend in data series from 1966–2010.
- Maximum depth—score = 0. Mann-Kendall two-tailed test detected no statistically significant trend in data series from 1966–2010.
- Width-to-mean-depth ratio—score = 6. Mann-Kendall two-tailed test detected a statistically significant trend in data series from 1966–2010. Mann-Kendall lower-tailed test indicated a decreasing trend in data series from 1966–2010.

#### **Indicators of alteration: functionality**

- Presence of a continuous and large floodplain from both river banks—score = 0. We considered that the Lower Prahova River crosses a lowland, therefore, we assumed that it crosses a continuous and large floodplain.

- Connectivity between terraces and river corridor from both banks length—score = 0. We considered Lower Prahova River to be connected with the terraces on 97.4% from both banks (except for levees for protection against floods).
- Intensity of lateral migration of meanders—score = 2. We considered the presence of one rotation and one extension processes between 1954 and 2005 as a moderate intensity of lateral migration of meanders.
- Intensity of cut-off process before and after 1954—score = 6. We considered the cut-off process as being less intense after 1954, because 2 cuts-off happened between 1954 and 2005 compared to 12 cuts-off between 1900 and 1954 (Table S4).
- Presence of erosion and accumulation processes in the river channel—score = 2. We counted 14 examples of accumulating convex banks with bars devoid of vegetation among 52 analyzed meanders, which we classified as moderate intensity of meandering process.
- Length of a potentially erodible corridor from both banks length—score = 0. We estimated the length of the potentially erodible corridor as corresponding to 70.4% from both banks (except for reforested banks and levees for defense against flooding).
- Composition of the substrate—score = 2. We noticed on cross-sectional profiles that grain-size diminished from gravel and sand before 1995 to only sand exclusively after 1995.
- Presence of large wood in-stream—score = 0. We recorded occasionally presence of trunks and branches.
- Presence of oxbow wetlands—score = 2. We determined that all the oxbow wetlands present in 1954 were still functioning in 2005.
- Return period of bankfull discharge ( $Q_b$ )—score = 3. We estimated  $Q_b$  at 278 m<sup>3</sup>/s and the return period at 2.8 years.
- Frequency of geomorphologically efficient floods ( $Q_{10}$ )—score = 0. We estimated  $Q_{10}$  at 550 m<sup>3</sup>/s and we counted five geomorphologically efficient floods during the analyzed time horizon (in 1966, 1972, 1975, 1997, and 2005).

**Table S4.** Cut-off of meanders during 1900–2005 time horizon.

| Year | Number of Meanders | Period    | Number of Cuts-Off |
|------|--------------------|-----------|--------------------|
| 1900 | 52                 | 1900–1954 | 12 [2]             |
| 1954 | 53                 |           |                    |
| 2005 | 52                 | 1954–2005 | 2                  |

## References

1. Aquaproiect. *Atlasul Cadastrului Apelor din Romania*; Ministerul Mediului: Bucharest, Romania, 1992.
2. Ioana-Toroimac, G. La Dynamique Hydrogéomorphologique de la rivière Prahova: Fonctionnement Actuel, évolution récente et conséquences géographiques. Ph.D. Thesis, University Lille 1 Sciences and Technologies, Lille, France, 2009.

3. Rinaldi, M.; Surian, N.; Comiti, F.; Bussettini, M. The morphological quality index (MQI) for stream evaluation and hydromorphological classification. *Ital. J. Eng. Geol. Environ.* **2011**, *1*, 17–36.
4. Bravard, J.P.; Fagot, P.; Gadiolet, P.; Magne, M. Étude de dendrochronologie dans le lit majeur de l'Ain: la forêt alluviale comme descripteur d'une « métamorphose fluviale». *Revue de géographie de Lyon* **1989**, *64*, 213–223.
5. Leopold, L.B.; Wolman, M.G.; Miller, J.P. *Fluvial Processes in Geomorphology*; W.H. Freeman: San Francisco, CA, USA, 1964.
6. McCuen, R.H. *Modeling Hydrologic Change*; CRC Press: Boca Raton, FL, USA, 2003.
7. Salit, F. De l'eau, des digues, des hommes. Approche géographique du risque inondation sur le Siret inférieur (Roumanie). Ph.D. Thesis, University Paris Diderot, Paris, France, 2013.
8. James, L.A. Channel incision on the Lower American River, California, from streamflow gage records. *Water Resour. Res.* **1997**, *33*, 485–490.
9. Rasmussen, J.; Mossa, J. Oxbow lakes as indicators of river channel change: Leaf River, Mississippi, USA. *Phys. Geogr.* **2011**, *32*, 497–511.
10. Salmi, T.; Maatta, A.; Anttila, P.; Ruoho-Airola, T.; Amnell, T. *Detecting Trends of Annual Values of Atmospheric Pollutants by the Mann-Kendall Test and Sen's Slope Estimates*; Finish Meteorological Institute: Helsinki, Finland, 2002.
11. Rinaldi, M.; Surian, N.; Comiti, F.; Bussetini, M. A method for the assessment and analysis of the hydromorphological conditions of Italian streams: The Morphological Quality Index (MQI). *Geomorphology* **2013**, *180–181*, 96–108.
12. Hooke, J. The distribution and nature of changes in river channel patterns. The example of Devon. In *River Channel Changes*; Gregory, K.J., Ed.; Wiley and Sons: Chichester, UK, 1977; pp. 265–280.
13. Leopold, L.B. *Crossing a River: A Preliminary Analysis of Some Hydraulic Aspects, Determining Hydraulic Elements of Rivers by Indirect Methods, Military Hydrology (Manual no.H-7, Corps of Engineering, Military Hydrology, Research and Development)*; US Geological Survey: Washington DC, USA, 1954.
14. Tromp, E.; Rengers, J.; van den Berg, H.; Pelders, E. Levees in a changing environment: Flexible, strategic and planning. In Proceedings of the 6th International Conference on Flood Management, São Paulo, Brazil, 16–18 September 2014; pp. 1–19.
15. Arnaud-Fassetta, G.; Cossart, E.; Fort, M. Hydro-Geomorphologic hazards an impact of man-made structures during the catastrophic flood of June 2000 in the Upper Guil catchment (Queyras, Southern French Alps). *Geomorphology* **2005**, *66*, 41–67.
